# Supplementary material
Source: publisher site journal article supplement (https://www.dovepress.com/article/supplementary_file/573262/573262%20Supplementary%20file.docx)
Supplement: Supplementary file 1 [file 573262%20Supplementary%20file.docx]

**Supplemental Table 1: Inclusion and exclusion criteria for the Phase I trial of self-administered Artesunate pessaries (vaginal inserts) for treatment of cervical precancer in Kisumu, Kenya**

| Inclusion Criteria | Exclusion Criteria |
| --- | --- |
| Age 18 years or older | Current pregnancy or breastfeeding status |
| Cervical lesions referred for excision with CIN2/3 diagnosis on biopsy | Current or past history of invasive cervical cancer  History of total hysterectomy |
| Weight ≥50 Kg at study entry* | CD4 count <200 at time of study entry if HIV positive |
| Agreement to use contraception (barrier hormonal, long-acting reversible contraception, or other methods) through week 24 of the study if of childbearing age | Presence of adenocarcinoma in situ on cervical biopsy |
| Ability and willingness to provide informed consent | Currently receiving systemic chemotherapy or radiation therapy for another cancer |
|  | Current use of systemic immunosuppressants or steroids (>10 mg of prednisone or equivalent) |
|  | Have a medical comorbidity that in the opinion of the investigator would interfere with study participation |
|  | Chemotherapy within 1 month prior to day 1 of study treatment |
|  | Male at birth |
|  | Current use of efavirenz antiretroviral therapy |

* Justification for weight criteria: A minimum body weight of 50Kg will meet the planned

artesunate dosing of ≤4 mg/Kg for which excellent safety data is available.
